# Supplementary material for: Thyroid cancer incidence trend and association with obesity, physical activity in the United States
Source: PubMed Central journal article supplement (PMC9281136; doi:10.1186/s12889-022-13727-3), 2022-07-12
Supplement: 12889_2022_13727_MOESM1_ESM.pdf [file 12889_2022_13727_MOESM1_ESM.pdf]

**A Obesity, Physical Activity, and AAPC Male**

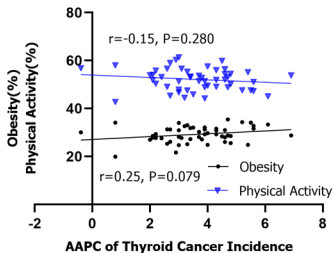

**B Obesity, Physical Activity, and AAPC Female**

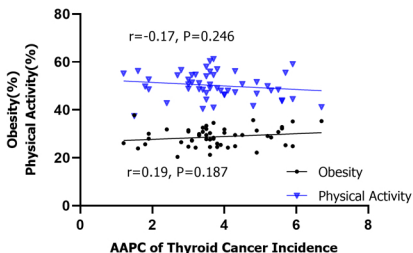

**Supplementary Figure. S1: The correlation between obesity and physical activity level, thyroid cancer AAPC by sex. The abscissa represents state-level the average obesity prevalence during 2011–2017; the ordinate represents the average physical activity ratio at the state-level; the Black dots and blue triangle represent states.**

**(A): Correlation between AAPC of the TC and physical activity level, obesity in male;**

**(B): Correlation between AAPC of the TC and physical activity level, obesity in female.**
