# Supplementary material for: Thyroid cancer incidence trend and association with obesity, physical activity in the United States
Source: PubMed Central journal article supplement (PMC9281136; doi:10.1186/s12889-022-13727-3), 2022-07-12
Supplement: 12889_2022_13727_MOESM2_ESM.pdf [file 12889_2022_13727_MOESM2_ESM.pdf]

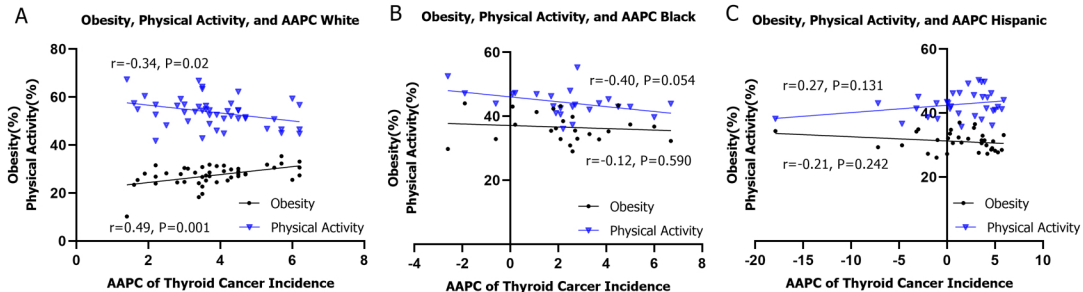

**Supplementary Figure. S2: The correlation between obesity and physical activity level, thyroid cancer AAPC by race/ethnicity. The abscissa represents state-level the average obesity prevalence during 2011–2017; the ordinate represents the average physical activity ratio at the state-level; the Black dots and blue triangle represent states. (A): Correlation between AAPC of the TC and physical activity level, obesity in White; (B): Correlation between AAPC of the TC and physical activity level, obesity in Black; (C): Correlation between AAPC of the TC and physical activity level, obesity in Hispanic.**
